# Supplementary material for: SARS-CoV-2 infection results in immune responses in the respiratory tract and peripheral blood that suggest mechanisms of disease severity
Source: PubMed Central journal article supplement (PMC9120039; doi:10.1038/s41467-022-30088-y), 2022-05-19
Supplement: 41467_2022_30088_MOESM1_ESM.pdf [file 41467_2022_30088_MOESM1_ESM.pdf]

## SUPPLEMENTARY INFORMATION

### **SARS-CoV-2 infection results in immune responses in the respiratory tract and peripheral blood that suggest mechanisms of disease severity**

Wuji Zhang<sup>1</sup>, Brendon Y. Chua<sup>1,2</sup>, Kevin J. Selva<sup>1</sup>, Lukasz Kedzierski<sup>1,3</sup>, Thomas M. Ashhurst<sup>4,5</sup>, Ebene R. Haycroft<sup>1</sup>, Suzanne K. Shoffner-Beck<sup>6</sup>, Luca Hensen<sup>1</sup>, David F. Boyd<sup>7</sup>, Fiona James<sup>8</sup>, Effie Mouhtouris<sup>8</sup>, Jason C. Kwong<sup>1,8</sup>, Kyra Y. L. Chua<sup>8</sup>, George Drewett<sup>8</sup>, Ana Copaescu<sup>8</sup>, Julie E. Dobson<sup>9</sup>, Louise C. Rowntree<sup>1</sup>, Jennifer R. Habel<sup>1</sup>, Lilith F. Allen<sup>1</sup>, Hui-Fern Koay<sup>1</sup>, Jessica A. Neil<sup>1</sup>, Matthew Gartner<sup>1</sup>, Christina Y. Lee<sup>6</sup>, Patiyan Andersson<sup>10</sup>, Sadid F. Khan<sup>11</sup>, Luke Blakeway<sup>11</sup>, Jessica Wisniewski<sup>11</sup>, James H. McMahon<sup>11,12</sup>, Erica E Vine<sup>13,14,15</sup>, Anthony L Cunningham<sup>13,15</sup>, Jennifer Audsley<sup>16</sup>, Irani Thevarajan<sup>16,17</sup>, Torsten Seemann<sup>10</sup>, Norelle L. Sherry<sup>8,10</sup>, Fatima Amanat<sup>18,19</sup>, Florian Krammer<sup>18</sup>, Sarah L. Londrigan<sup>1</sup>, Linda M. Wakim<sup>1</sup>, Nicholas J.C. King<sup>4,5,14,20-22</sup>, Dale I. Godfrey<sup>1</sup>, Laura K. Mackay<sup>1</sup>, Paul G. Thomas<sup>7</sup>, Suellen Nicholson<sup>23</sup>, Kelly B. Arnold<sup>6</sup>, Amy W. Chung<sup>1</sup>, Natasha E. Holmes<sup>8,24-26</sup>, Olivia C. Smibert<sup>8,27,28</sup>, Jason A. Trubiano<sup>26-29#</sup>, Claire L. Gordon<sup>1,8#</sup>, Thi H.O. Nguyen<sup>1#</sup> and Katherine Kedzierska<sup>1,2#</sup>

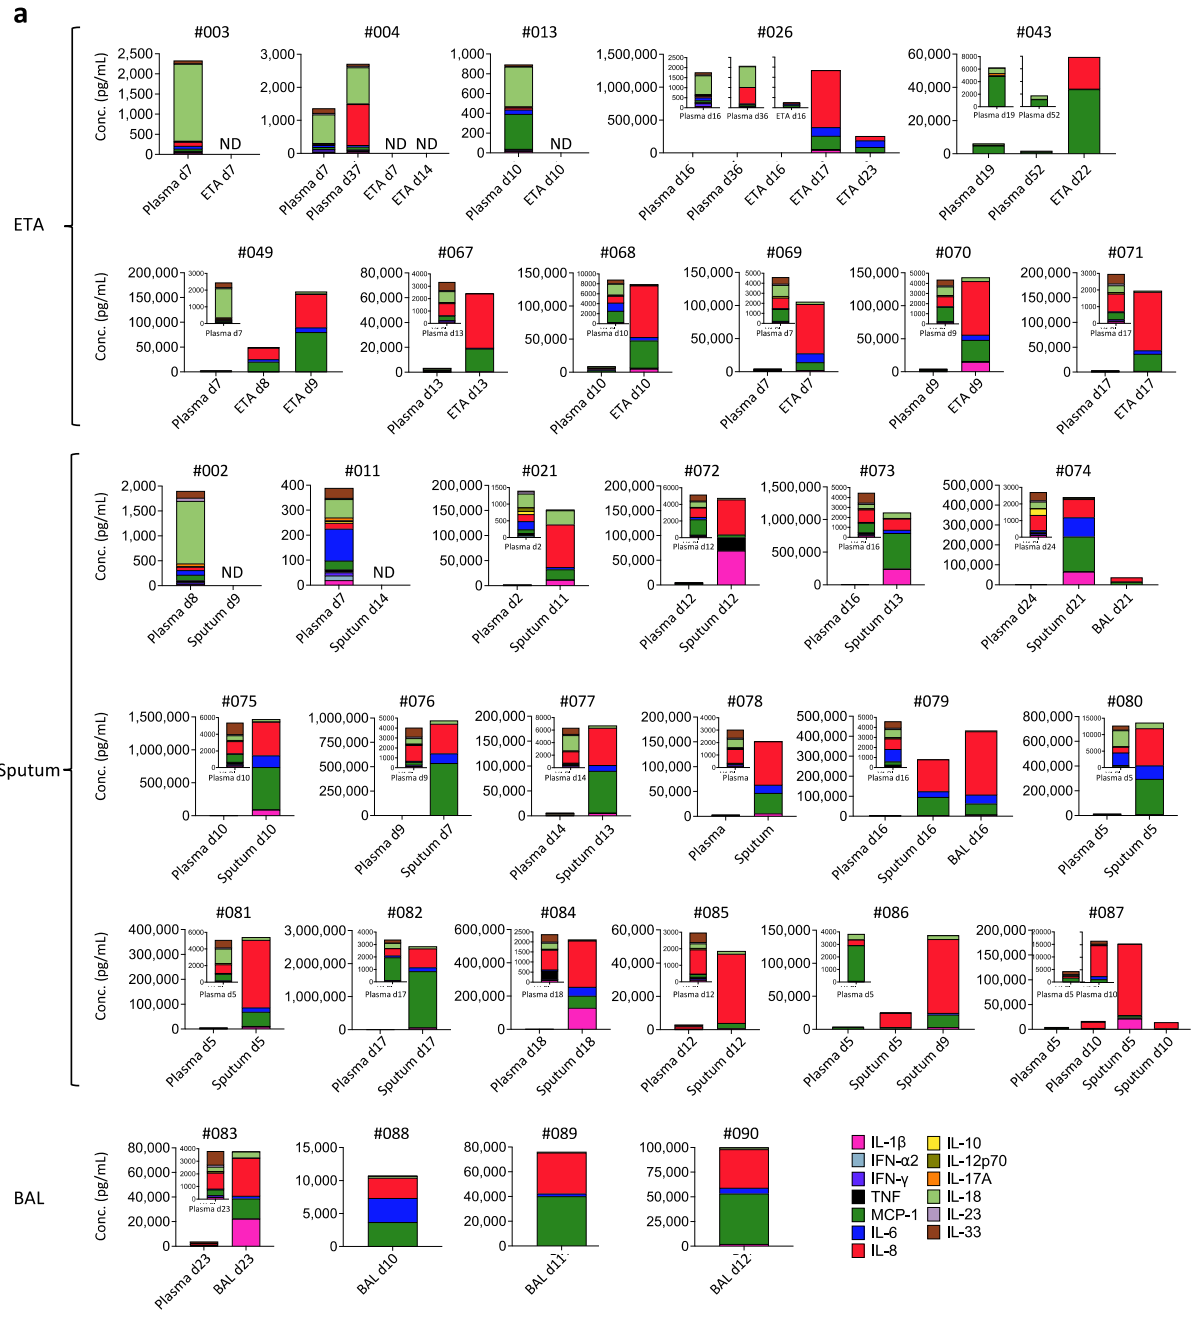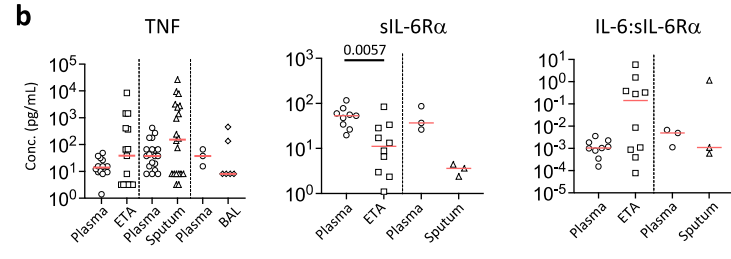

**Supplementary Fig. 1 MCP-1, IL-6 and IL-8 dominate in COVID-19 respiratory samples.**

**(a)** Distribution of 13 cytokines and chemokines (IL-1 $\beta$ , IFN- $\alpha$ 2, IFN- $\gamma$ , TNF, MCP-1, IL-6, IL-8, IL-10, IL-12p70, IL-17A, IL-18, IL-23, and IL-33) in each COVID-19 patient that respiratory samples were collected. **(b)** Comparison of levels of TNF, soluble IL-6 receptor  $\alpha$  (sIL-6R $\alpha$ ), and IL-6:sIL-6R $\alpha$  ratio between plasma and respiratory samples for COVID-19 and non-COVID-19 patients. n<sub>ETA</sub>=15, n<sub>ETA matched plasma</sub>=14, n<sub>Sputum</sub>=20, n<sub>Sputum matched plasma</sub>=19, n<sub>BAL</sub>=6, n<sub>BAL matched plasma</sub>=3. Bars indicate median values. Statistical significance was determined with two-sided Mann-Whitney test. Source data are provided as a Source Data file.

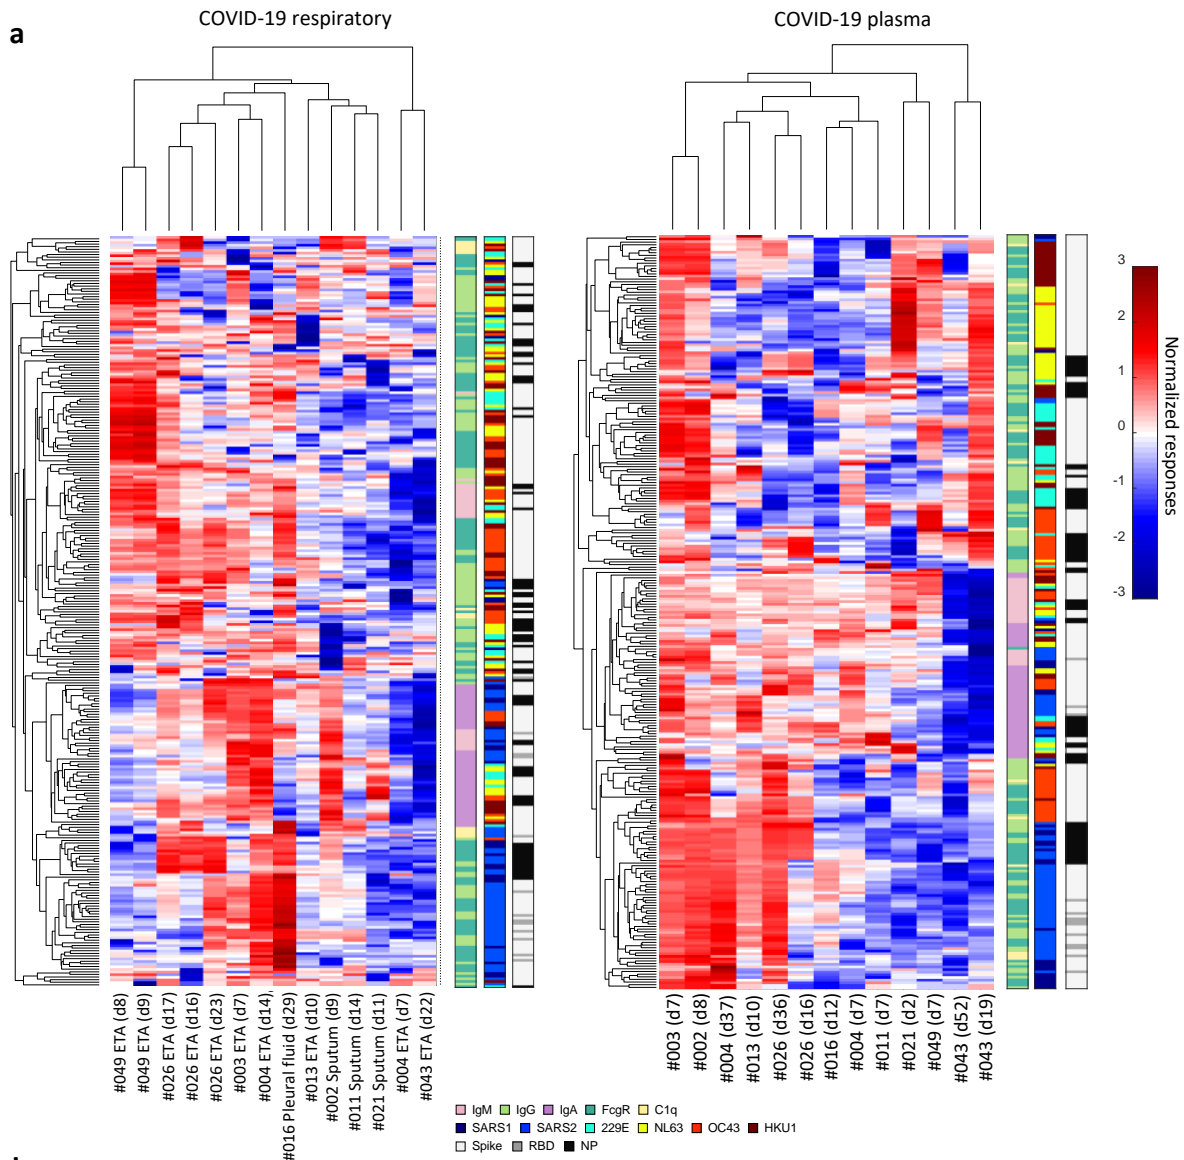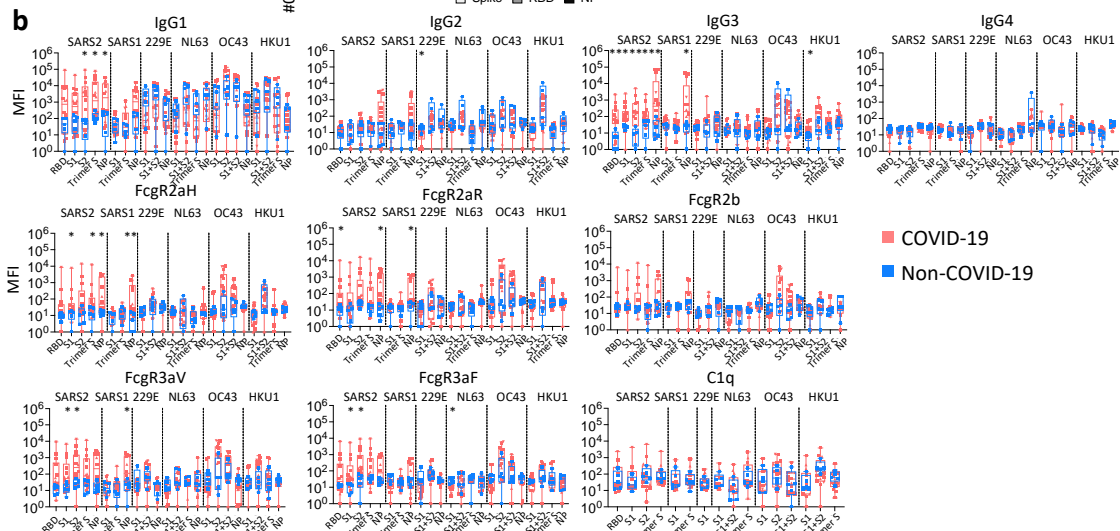

**Supplementary Fig. 2 Higher SARS-CoV-2-specific antibodies in COVID-19 than non-COVID-19 respiratory samples.** (a) Heatmaps with unsupervised clustering of antibodies against receptor binding domain (RBD), spike proteins (S), and nucleoprotein (NP) of SARS-CoV-2 (SARS2) and other human coronaviruses including SARS-CoV-1 (SARS1), 229E, NL63, OC43, and HKU1 in COVID-19 plasma and respiratory samples (endotracheal tube aspirate (ETA), sputum, or pleural fluid), as measured by multiplex bead array assay. (b) Median fluorescence intensity of IgG1-4 and antibodies with FcγR2aH, FcγR2aR, FcγR2b, FcγR3aV, FcγR3aF, or C1q binding abilities between COVID-19 and non-COVID-19 respiratory samples. The bounds of the box plot indicate the 25<sup>th</sup> and 75<sup>th</sup> percentiles, the bar indicates medians, and the whiskers indicate minima and maxima. Statistical significance was determined with two-sided Mann-Whitney test. The P values for IgG1 against SARS2 S2, SARS2 Trimer S and SARS2 NP are 0.0352, 0.0194, 0.0194 respectively. The P value for IgG2 against 229E S1 is 0.0314. The P values for IgG3 against SARS2 RBD, SARS2 S1, SARS2 S2, SARS2 Trimer S, SARS2 NP, SARS1 NP and HKU1 S1 are 0.0070, 0.0437, 0.0052, 0.0064, 0.0103, 0.0419, 0.0357 respectively. The P values for antibodies with FcγR2aH binding ability against SARS2 S1, SARS2 Trimer S, SARS2 NP and SARS1 NP are 0.0454, 0.0339, 0.0455, 0.0076 respectively. The P values for antibodies with FcγR2aR binding ability against SARS2 RBD, SARS2 NP and SARS1 NP are 0.0461, 0.0194, 0.0437 respectively. The P values for antibodies with FcγR3aV binding ability against SARS2 S1, SARS2 S2 and SARS1 NP are 0.0437, 0.0437, 0.0339 respectively. The P values for antibodies with FcγR3aF binding ability against SARS2 S1, SARS2 S2 and NL63 S1 are 0.0437, 0.0324, 0.0147 respectively. n<sub>COVID-19 ETA</sub>=10, n<sub>COVID-19 Sputum</sub>=3, n<sub>COVID-19 pleural fluid</sub>=1, n<sub>Respiratory matched COVID-19 plasma</sub>=13, n<sub>Non-COVID-19 ETA</sub>=5, n<sub>Non-COVID-19 sputum</sub>=1. Source data are provided as a Source Data file.

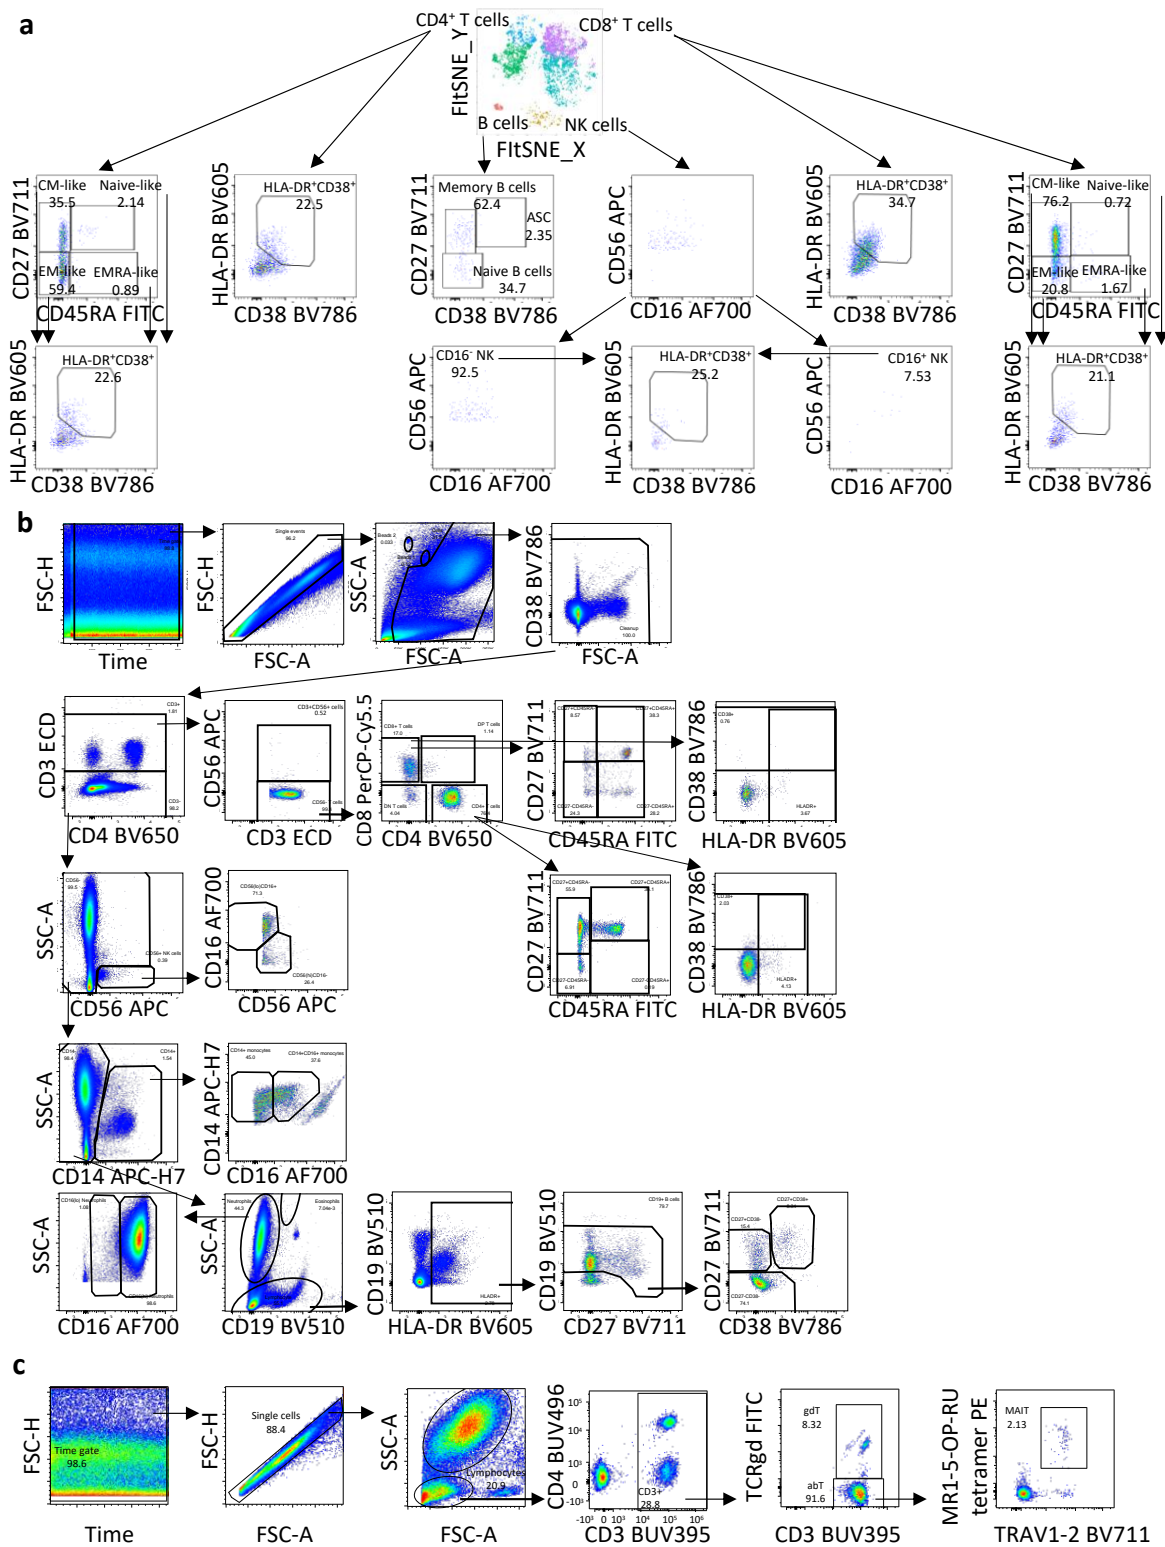

**Supplementary Fig. 3 Gating strategies for flow cytometry analyses. (a) Respiratory myeloid antibody panel. (b) Whole blood lymphocyte antibody panel. c Whole blood innate T cell panel.**

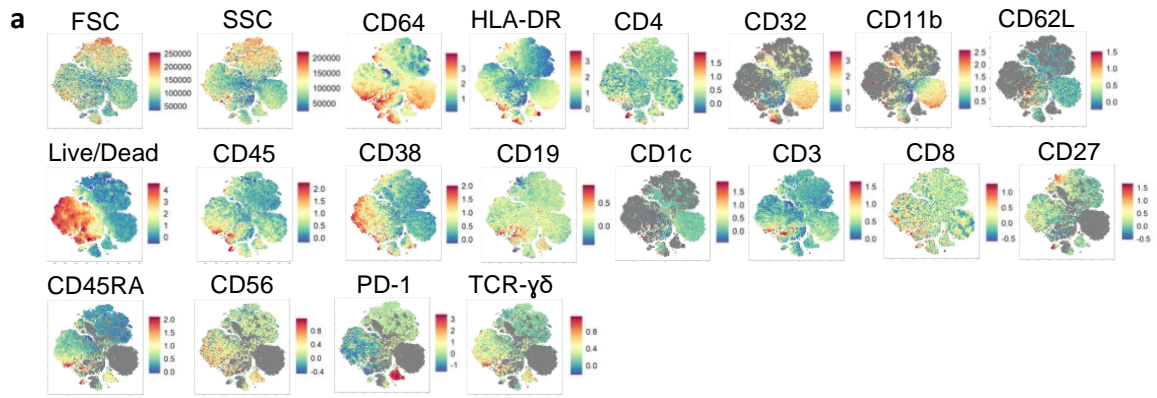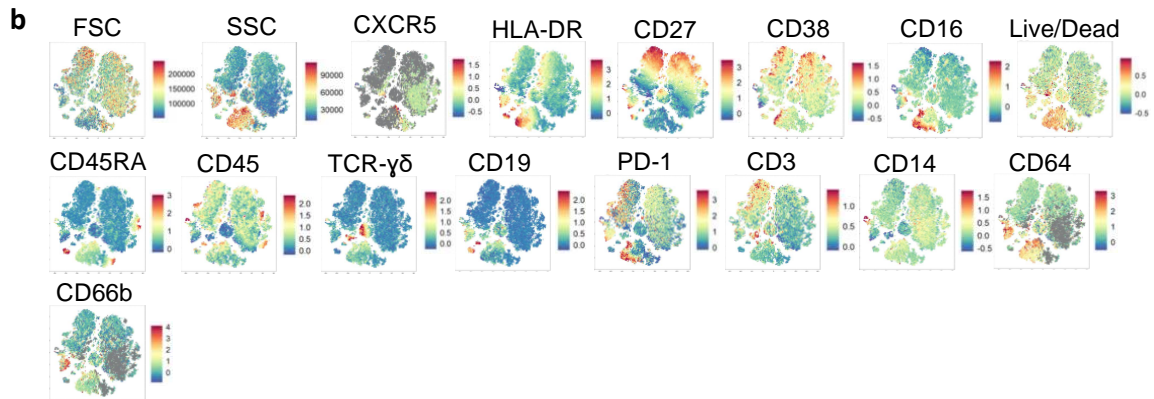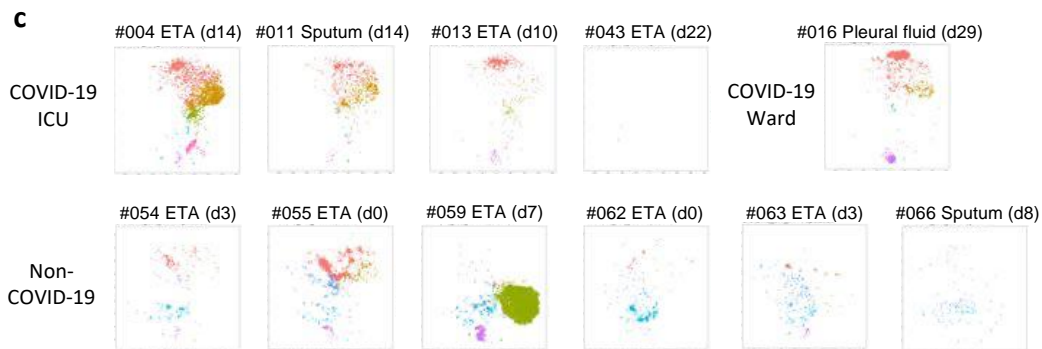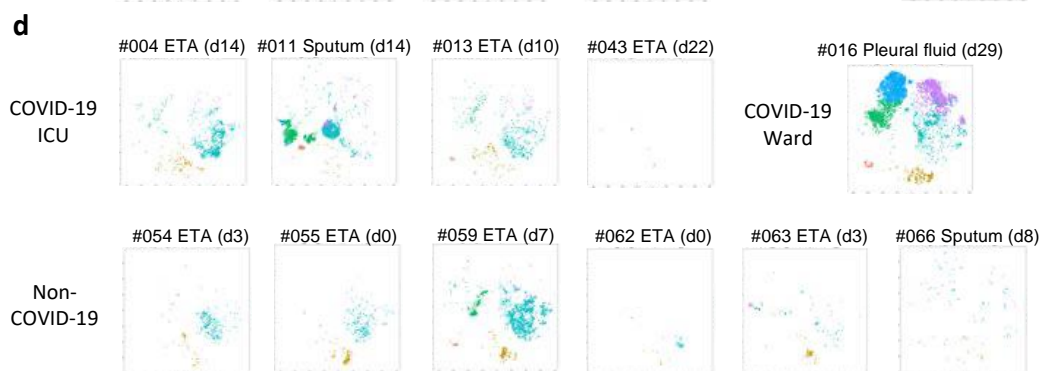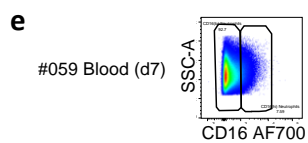

**Supplementary Fig. 4 Flow Self-Organizing Map (FlowSOM) analyses of respiratory samples. (a-b)** Cell surface marker expression of **(a)** respiratory myeloid antibody panel and **(b)** respiratory lymphocyte antibody panel. **(c-d)** Individual Fit-SNE plots of the **c** myeloid antibody panel and **d** lymphocyte antibody panel. **(e)** Representative flow cytometry plot of #059 blood neutrophils.



**Supplementary Table 1 COVID-19 cohort demographics**

| Patient           | Age   | Sex | Days post disease onset <sup>#</sup> |    |                     | Days in hospital | Location during hospitalization | Oxygen supply | Drug therapy |
|-------------------|-------|-----|--------------------------------------|----|---------------------|------------------|---------------------------------|---------------|--------------|
|                   |       |     | V1                                   | HS | V7                  |                  |                                 |               |              |
| 001               | 71-80 | M   |                                      | 19 |                     | 30               | Ward                            | NP/HM         | D+R          |
| 002 <sup>R</sup>  | 41-50 | M   |                                      | 8  |                     | 9                | ICU                             | NP            | D+R          |
| 003 <sup>R</sup>  | 41-50 | M   | 7                                    |    |                     | 18               | ICU                             | ETT           | D+R          |
| 004 <sup>R</sup>  | 61-70 | F   | 7                                    |    | 37                  | 31               | ICU                             | ETT           | D            |
| 005               | 71-80 | F   | 3                                    |    |                     | 6                | Ward                            | NP            | D+R          |
| 006               | 31-40 | F   | 11                                   |    | 12                  | 2                | Ward                            | N             | N            |
| 007               | 21-30 | F   | 7                                    |    | 8                   | 2                | Ward                            | N             | N            |
| 008               | 21-30 | F   | 11                                   |    | 12                  | 2                | Ward                            | N             | N            |
| 009               | 51-60 | F   | 7                                    |    | 8                   | 2                | Ward                            | N             | N            |
| 010               | 51-60 | M   | 11                                   |    |                     | 6                | Ward                            | N             | D            |
| 011 <sup>R</sup>  | 41-50 | F   | 7                                    |    |                     | 27               | ICU                             | NP            | D+R          |
| 012               | 61-70 | M   | 9                                    |    |                     | 13               | ICU                             | NP            | D+R          |
| 013 <sup>R</sup>  | 61-70 | M   | 10                                   |    |                     | 12               | ICU                             | ETT           | D+R          |
| 014               | 31-40 | M   | 10                                   |    |                     | 6                | Ward                            | N             | D            |
| 015               | 21-30 | M   | 5                                    |    |                     | 2                | Ward                            | N             | N            |
| 016               | 61-70 | M   | 12                                   |    |                     | 9                | Ward                            | N             | N            |
| 017               | 71-80 | M   | 13                                   |    |                     | 4                | Ward                            | N             | N            |
| 018               | 71-80 | F   | 7                                    |    |                     | 4                | Ward                            | N             | N            |
| 019               | 21-30 | M   | 5                                    |    | 16                  | 11               | Ward                            | N             | D+R          |
| 020               | 71-80 | M   | 5                                    |    |                     | 9                | Ward                            | NP            | D+R          |
| 021 <sup>R</sup>  | 61-70 | F   | 2                                    |    |                     | 19               | Ward                            | NP/HM         | D            |
| 022               | 51-60 | M   | 7                                    |    | 10                  | 4                | Ward                            | N             | N            |
| 023               | 51-60 | M   | 8                                    |    | 15                  | 9                | ICU                             | NP/HM         | D+R          |
| 024               | 61-70 | F   | 12                                   |    |                     | 4                | Ward                            | N             | N            |
| 025               | 51-60 | F   | 5                                    |    | 26                  | 21               | ICU                             | HFNP          | D            |
| 026 <sup>R</sup>  | 51-60 | F   | 16                                   |    | 36                  | 29               | ICU                             | ETT           | D            |
| 027               | 51-60 | F   | 6                                    |    |                     | 3                | Ward                            | N             | N            |
| 028               | 31-40 | F   | 12                                   |    | 17                  | 6                | Ward                            | N             | N            |
| 029               | 61-70 | M   | 7                                    |    | 28                  | 23               | Ward                            | HFNP          | D            |
| 030               | 71-80 | F   | 12                                   |    | 15/18 <sup>##</sup> | 47               | ICU                             | N             | N            |
| 031               | 81-90 | M   | 2                                    |    | 10                  | 24               | Ward                            | N             | N            |
| 032               | 31-40 | M   | 11                                   |    |                     | 1                | Ward                            | N             | N            |
| 033               | 21-30 | F   | 9                                    |    |                     | 1                | Ward                            | N             | N            |
| 034               | 41-50 | F   | 8                                    |    | 11                  | 4                | Ward                            | NP            | D+R          |
| 035               | 21-30 | F   | 13                                   |    |                     | 2                | Ward                            | N             | D            |
| 036               | 61-70 | M   | 9                                    |    |                     | 2                | Ward                            | N             | N            |
| 037               | 51-60 | F   | 9                                    |    |                     | 7                | Ward                            | N             | D            |
| 038               | 61-70 | F   | 9                                    |    | 12                  | 4                | Ward                            | NP            | D            |
| 039               | 81-90 | M   | 9                                    |    | 14                  | 5                | Ward                            | NP            | D+R          |
| 040               | 71-80 | M   | 4                                    |    | 27                  | 25               | Ward                            | NP            | D            |
| 041               | 31-40 | M   | 6                                    |    |                     | 1                | Ward                            | N             | N            |
| 042               | 21-30 | M   | 7                                    |    | 12                  | 4                | Ward                            | NP            | D+R          |
| 043 <sup>R</sup>  | 61-70 | M   |                                      | 19 | 52                  | 44               | ICU                             | ETT           | D            |
| 044               | 71-80 | F   | 3                                    |    | 10/16 <sup>##</sup> | 17               | ICU                             | NP            | D+R          |
| 045               | 51-60 | M   | 7                                    |    |                     | 4                | ICU                             | NP            | D+R          |
| 046               | 81-90 | M   | 15                                   |    | 24                  | 11               | Ward                            | N             | N            |
| 047               | 71-80 | M   | 8                                    |    |                     | 6                | Ward                            | NP            | D            |
| 048               | 51-60 | M   | 10                                   |    | 17                  | 7                | ICU                             | NP            | D            |
| 049 <sup>R</sup>  | 21-30 | F   | 7                                    |    |                     | 6                | ICU                             | ETT           | D+R          |
| 050               | 51-60 | F   | 7                                    |    |                     | 12               | Ward                            | NP            | D+R          |
| 051               | 71-80 | F   | 14                                   |    | 17                  | 5                | Ward                            | NP            | N            |
| 052               | 51-60 | F   | 11                                   |    | 16                  | 6                | Ward                            | N             | N            |
| 053               | 81-90 | M   | 6                                    |    | 15                  | 13               | Ward                            | N             | D            |
| 054 <sup>R*</sup> | 41-50 | F   | 3 <sup>^</sup>                       |    | 53                  | 51               | ICU                             | ETT           | N            |
| 055 <sup>R*</sup> | 71-80 | F   | 0 <sup>^</sup>                       |    | 19                  | 19               | ICU                             | ETT           | N            |
| 056               | 51-60 | M   | 35                                   |    | 41                  | 8                | ICU                             | NP            | D            |
| 057               | 31-40 | F   | 10                                   |    | 11                  | 2                | Ward                            | N             | N            |

|                   |       |   |                |      |    |      |      |     |
|-------------------|-------|---|----------------|------|----|------|------|-----|
| 058               | 51-60 | M | 12             | 20   | 10 | Ward | NP   | D   |
| 059 <sup>R*</sup> | 81-90 | M | 7              |      | 22 | ICU  | ETT  | N   |
| 060               | 41-50 | F | 13             | 16   | 4  | Ward | N    | N   |
| 061               | 71-80 | M | 0              |      | 7  | Ward | NP   | D   |
| 062 <sup>R*</sup> | 61-70 | M | 0 <sup>^</sup> |      | 13 | ICU  | ETT  | N   |
| 063 <sup>R*</sup> | 81-90 | M | 3              |      | 10 | ICU  | ETT  | N   |
| 064               | 41-50 | M |                |      | 7  | ICU  | HFNP | D+R |
| 065               | 41-50 | F | 5              |      | 1  | Ward | N    | N   |
| 066 <sup>R*</sup> | 61-70 | F | 8              |      | 3  | Ward | NP   | N   |
| 067 <sup>R</sup>  | 31-40 | F |                | 13   | 21 | ICU  | ETT  | D+R |
| 068 <sup>R</sup>  | 41-50 | M |                | 10   | 27 | ICU  | ETT  | D   |
| 069 <sup>R</sup>  | 61-70 | M |                | 7    | 24 | ICU  | ETT  | D   |
| 070 <sup>R</sup>  | 31-40 | M |                | 9    | 23 | ICU  | ETT  | D   |
| 071 <sup>R</sup>  | 51-60 | M |                | 17   | 17 | ICU  | ETT  | D+R |
| 072 <sup>R</sup>  | 21-30 |   |                | 12   |    | ICU  | ETT  | D   |
| 073 <sup>R</sup>  | 61-70 |   |                | 16   |    | ICU  | ETT  | D   |
| 074 <sup>R</sup>  | 51-60 |   |                | 24   |    | ICU  | ETT  | D+R |
| 075 <sup>R</sup>  | 51-60 |   |                | 10   |    | ICU  | ETT  | D   |
| 076 <sup>R</sup>  | 61-70 |   |                | 9    |    | ICU  | HFNP | D+R |
| 077 <sup>R</sup>  | 51-60 |   |                | 14   |    | ICU  | ETT  | D   |
| 078 <sup>R</sup>  | 51-60 |   |                |      |    | ICU  | ETT  | D+R |
| 079 <sup>R</sup>  | 21-30 |   |                | 16   |    | ICU  | ETT  | R   |
| 080 <sup>R</sup>  | 71-80 |   |                | 5    |    | ICU  | ETT  | D   |
| 081 <sup>R</sup>  | 71-80 |   |                | 5    |    | ICU  | ETT  | D   |
| 082 <sup>R</sup>  | 51-60 |   |                | 17   |    | ICU  | ETT  | D+R |
| 083 <sup>R</sup>  | 41-50 |   |                | 23   |    | ICU  | ETT  | D+R |
| 084 <sup>R</sup>  | 61-70 |   |                | 18   |    | ICU  | ETT  | D   |
| 085 <sup>R</sup>  | 41-50 | F |                | 12   | 4  | ICU  | ETT  | D   |
| 086 <sup>R</sup>  | 61-70 | M |                | 5    | 5  | Ward | N    |     |
| 087 <sup>R</sup>  | 51-60 | M |                | 5/10 | 4  | Ward | N    |     |
| 088 <sup>R</sup>  | 61-70 | M |                |      | 24 | ICU  | ETT  | N   |
| 089 <sup>R</sup>  | 31-40 | F |                |      | 26 | ICU  | ETT  | N   |
| 090 <sup>R</sup>  | 61-70 | M |                |      | 43 | ICU  | ETT  | D   |

<sup>#</sup>Days post disease onset of blood samples collection. <sup>R</sup>Patients with respiratory samples collected. \*Non-COVID-19 patients with variable disease: 054, decompensated alcoholic hepatitis with encephalopathy; 055, hemangioblastoma intracranial haemorrhage; 059, Klebsiella pneumonia; 062, intracranial haemorrhage; 063, atypical pneumonia; 066, infective exacerbation of chronic obstructive pulmonary disease. <sup>^</sup>Date of intubation was used because of no respiratory disease onset. <sup>##</sup>Patients with delays after anticipated discharge date, data from the later sample were used for analyses if available. V1, hospital admission; HS, hospital stay; V7, hospital discharge. In patients 072-084, 3 were female. Abbreviations: N, none; NP, nasal prong; NP/HM, nasal prong/ Hudson mask; HFNP, high flow nasal prong; ETT, endotracheal tube; D, dexamethasone; R, remdesivir; D+R, dexamethasone and remdesivir.

**Supplementary Table 2 Clinical summary of COVID-19 cohort**

| COVID-19 positive patients                                                       | Total<br>(n=84) | Ward<br>(n=45)   | ICU<br>(n=39)     | p value <sup>a</sup>    |
|----------------------------------------------------------------------------------|-----------------|------------------|-------------------|-------------------------|
| <b>Age</b> (years), median (range)                                               | 56.5 (22-90)    | 58 (22-90)       | 56 (25-78)        | 0.5814 <sup>c</sup>     |
| <b>Female</b> , n (%)                                                            | 31 (36.9%)      | 21 (46.7%)       | 10 (25.6%)        | 0.2673 <sup>d</sup>     |
| <b>Ethnicity</b> , n (%)                                                         |                 |                  |                   | 0.7936 <sup>d, e</sup>  |
| African                                                                          | 3 (3.6%)        | 1 (2.2%)         | 2 (5.1%)          |                         |
| Arabic                                                                           | 3 (3.6%)        | 3 (6.7%)         | 0                 |                         |
| Asian                                                                            | 5 (6%)          | 4 (8.9%)         | 1 (2.6%)          |                         |
| Aboriginal and Torres Strait Islander                                            | 1 (1.2%)        | 1 (2.2%)         | 0                 |                         |
| European                                                                         | 33 (39.3%)      | 24 (53.3%)       | 11 (28.2%)        |                         |
| Indo-Asian                                                                       | 2 (2.4%)        | 2 (4.4%)         | 0                 |                         |
| Middle Eastern                                                                   | 7 (8.3%)        | 5 (11.1%)        | 3 (7.7%)          |                         |
| Pacific Islander                                                                 | 1 (1.2%)        | 0                | 1 (2.6%)          |                         |
| Samoa                                                                            | 1 (1.2%)        | 0                | 1 (2.6%)          |                         |
| South Asian                                                                      | 4 (4.8%)        | 2 (4.4%)         | 2 (5.1%)          |                         |
| Turkish                                                                          | 1 (1.2%)        | 1 (2.2%)         | 0                 |                         |
| Maori                                                                            | 1 (1.2%)        | 0                | 1 (2.6%)          |                         |
| Unknown                                                                          | 19 (22.6%)      | 2 (4.4%)         | 17 (43.6%)        |                         |
| <b>Weight</b> (kg), median (range)                                               | 78 (44.4-128.7) | 75.5 (44.6-110)  | 91.8 (44.4-128.7) | 0.0008 <sup>c</sup>     |
| <b>Height</b> (cm), median (range)                                               | 167 (152-193)   | 165 (152-193)    | 170 (157-185)     | 0.0476 <sup>c</sup>     |
| <b>BMI</b> (kg/m <sup>2</sup> ), median (range)                                  | 27.4 (17.4-43)  | 26.4 (17.4-41.4) | 30.6 (18-43)      | 0.0085 <sup>c</sup>     |
| <b>Days from disease onset to hospitalization</b> , median (range)               | 7 (1-48)        | 7 (-1-14)        | 6 (0-48)          | 0.4447 <sup>c</sup>     |
| <b>Days in hospital</b> , median (range)                                         | 7 (1-47)        | 5 (1-30)         | 19.5 (4-47)       | <0.0001 <sup>c</sup>    |
| <b>Ward/ICU</b> , n (%)                                                          |                 |                  |                   | N/A                     |
| Ward                                                                             | 45 (53.6%)      | N/A              | N/A               |                         |
| ICU                                                                              | 39 (28.3%)      | N/A              | N/A               |                         |
| <b>NIH score</b> , n (%)                                                         |                 |                  |                   | <0.0001 <sup>d, f</sup> |
| 2                                                                                | 6 (7.14%)       | 6 (13.3%)        | 0                 |                         |
| 3                                                                                | 21 (25%)        | 20 (44.4%)       | 1 (2.6%)          |                         |
| 4                                                                                | 27 (32.1%)      | 16 (35.6%)       | 11 (28.2%)        |                         |
| 5                                                                                | 11 (13.1%)      | 1 (2.2%)         | 10 (25.6%)        |                         |
| <b>Oxygen support</b> , n (%)                                                    |                 |                  |                   | <0.0001 <sup>d, g</sup> |
| <b>None</b>                                                                      | 31 (36.9%)      | 30 (66.7%)       | 1 (2.6%)          |                         |
| <b>Non-invasive</b>                                                              | 26 (31%)        | 15 (33.3%)       | 11 (28.2%)        |                         |
| Nasal prong                                                                      | 19 (22.6%)      | 12 (26.7%)       | 7 (17.9%)         |                         |
| Nasal prong / Hudson mask                                                        | 3 (3.6%)        | 2 (4.4%)         | 1 (2.6%)          |                         |
| High flow nasal prong                                                            | 4 (4.8%)        | 1 (2.2%)         | 3 (7.7%)          |                         |
| <b>Invasive</b>                                                                  | 27 (32.1%)      | 0                | 27 (69.2%)        |                         |
| Endotracheal tube                                                                | 27 (32.1%)      | 0                | 27 (69.2%)        |                         |
| <b>Clinical presentation</b><br>(ILL/pneumonia/chest x-ray consolidation), n (%) |                 |                  |                   | 0.3142 <sup>d</sup>     |
| None                                                                             | 13 (15.5%)      | 11 (24.4%)       | 2 (5.1%)          |                         |
| Yes                                                                              | 47 (56%)        | 32 (71.1%)       | 15 (38.5%)        |                         |
| Unknown                                                                          | 24 (28.6%)      | 2 (4.4%)         | 22 (56.4%)        |                         |
| <b>Drugs</b> , n (%)                                                             |                 |                  |                   | <0.0001 <sup>d, g</sup> |
| None                                                                             | 26 (31%)        | 23 (51.1%)       | 3 (7.7%)          |                         |
| Dexamethasone (5-day course)                                                     | 30 (35.7%)      | 12 (26.7%)       | 18 (46.2%)        |                         |
| Dexamethasone (5-day course) + Remdesivir (5-day course)                         | 25 (30%)        | 8 (17.8%)        | 17 (43.6%)        |                         |
| Remdesivir                                                                       | 1 (1.2%)        | 0                | 1 (2.6%)          |                         |
| Unknown                                                                          | 2 (2.4%)        | 2 (4.4%)         | 0                 |                         |
| <b>Immunosuppressants</b> , n (%)                                                |                 |                  |                   | 0.7063 <sup>d, g</sup>  |
| None                                                                             | 57 (67.9%)      | 37 (82.2%)       | 20 (51.3%)        |                         |
| Ciclosporin + Mycophenolate mofetil                                              | 1 (1.2%)        | 1 (2.2%)         | 0                 |                         |
| Vinblastine + Prednisolone + Pembrolizumab                                       | 1 (1.2%)        | 1 (2.2%)         | 0                 |                         |
| Methotrexate + Prednisolone                                                      | 1 (1.2%)        | 0                | 1 (2.6%)          |                         |
| Prednisolone                                                                     | 3 (3.6%)        | 2 (4.4%)         | 1 (2.6%)          |                         |
| Dexamethasone                                                                    | 1 (1.2%)        | 1 (2.2%)         | 0                 |                         |
| Tacrolimus                                                                       | 1 (1.2%)        | 1 (2.2%)         | 0                 |                         |
| Tacrolimus + Mycophenolate mofetil                                               | 0               | 0                | 0                 |                         |
| Unknown                                                                          | 19 (22.6%)      | 2 (4.4%)         | 17 (43.6%)        |                         |
| <b>Smoker</b> , n (%)                                                            |                 |                  |                   | 0.1844 <sup>d, h</sup>  |
| Non-smoker                                                                       | 44 (52.4%)      | 31 (68.9%)       | 13 (33.3%)        |                         |
| Ex-smoker                                                                        | 8 (9.5%)        | 7 (15.6%)        | 1 (2.6%)          |                         |
| Smoker                                                                           | 7 (8.3%)        | 3 (6.7%)         | 4 (10.3%)         |                         |
| Unknown                                                                          | 25 (29.8%)      | 4 (8.9%)         | 21 (53.8%)        |                         |

<sup>a</sup>Comparison between COVID-19 positive ward and ICU patients.

<sup>b</sup>Comparison between COVID-19 positive and COVID-19 negative patients.

<sup>c</sup>Significance was determined using the two-sided Mann-Whitney test.

<sup>d</sup>Significance was determined using the two-sided Fisher's exact test.

<sup>e</sup>Comparison between European and other ethnicities.

<sup>f</sup>Comparison between NIH score 2, 3 and NIH score 4, 5.

<sup>g</sup>Comparison between patients with or without oxygen support, drug treatments, or immunosuppressants.

<sup>h</sup>Comparison between Non-smoker and Ex-smoker, and Smoker.

Weight, height, BMI, days from disease onset to hospitalization and NIH score unknown for 19 patients. Days in hospital unknown for 13 patients. Unknown datapoints were not included in statistical analyses.

Abbreviations: ICU, intensive care unit; N/A, not applicable; BMI, body mass index; NIH, National Institutes of Health; ILI, influenza-like-illness.

**Supplementary Table 3 Grading criteria of the National Institutes of Health (NIH) score\***

| NIH score                           | Criteria                                                                                                                                                                                                                                                                                                                                                               |
|-------------------------------------|------------------------------------------------------------------------------------------------------------------------------------------------------------------------------------------------------------------------------------------------------------------------------------------------------------------------------------------------------------------------|
| Asymptomatic/<br>Presymptomatic (1) | Individuals who: <ul style="list-style-type: none"><li>• test positive for SARS-CoV-2 by virologic testing, and</li><li>• have no symptoms</li></ul>                                                                                                                                                                                                                   |
| Mild (2)                            | Individuals who: <ul style="list-style-type: none"><li>• have COVID-19 symptoms such as fever, cough, sore throat, malaise, headache, muscle pain, and</li><li>• without shortness of breath, dyspnoea, or abnormal chest imaging</li></ul>                                                                                                                            |
| Moderate (3)                        | Individuals who: <ul style="list-style-type: none"><li>• have evidence of lower respiratory disease by clinical assessment or imaging, and</li><li>• have a saturation of oxygen (SpO<sub>2</sub>) ≥94% on room air at sea level</li></ul>                                                                                                                             |
| Severe (4)                          | Individuals who: <ul style="list-style-type: none"><li>• have respiratory frequency &gt;30 breaths per minute, or</li><li>• SpO<sub>2</sub> &lt;94% on room air at sea level, or</li><li>• ratio of arterial partial pressure of oxygen to fraction of inspired oxygen (PaO<sub>2</sub>/FiO<sub>2</sub>) &lt;300 mmHg, or</li><li>• lung infiltrates &gt;50%</li></ul> |
| Critical (5)                        | Individuals who: <ul style="list-style-type: none"><li>• have respiratory failure, septic shock, and/or multiple organ dysfunction</li></ul>                                                                                                                                                                                                                           |

\*<https://www.covid19treatmentguidelines.nih.gov/overview/clinical-spectrum/>

**Supplementary Table 4 Validation test of the surrogate Virus Neutralization Test**

| Sample                  | COVID-19 status | Dilution <sup>a</sup> | % Inhibition <sup>b</sup> |
|-------------------------|-----------------|-----------------------|---------------------------|
| COVID-19 positive serum | Positive        | Neat                  | 95.6                      |
|                         |                 | 1:2                   | 86.4                      |
|                         |                 | 1:10                  | 44.1                      |
| 055 ETA                 | Negative        | Neat                  | 10.5                      |
|                         |                 | 1:2                   | 87.3                      |
|                         |                 | 1:10                  | 43.1                      |
| 066 Sputum              | Negative        | Neat                  | 0                         |
|                         |                 | 1:2                   | 86.9                      |
|                         |                 | 1:10                  | 40.1                      |

<sup>a</sup>COVID-19 negative ETA and sputum were tested in neat or mixed with the COVID-19 positive serum until the COVID-19 positive serum was in the dilution as stated in the column.

<sup>b</sup>Positive % inhibition was defined as  $\geq 20\%$ .

Abbreviation: ETA, endotracheal aspirate.

**Supplementary Table 5 Panel design of the multiplex bead array assay**

| <b>Pathogens</b>                | <b>Proteins</b> | <b>Isotypes and FcγR/C1q bindings</b> |
|---------------------------------|-----------------|---------------------------------------|
| SARS-CoV-2                      | RBD             | IgG                                   |
|                                 | S1              | IgG1                                  |
|                                 | S2              | IgG2                                  |
|                                 | Trimeric S      | IgG3                                  |
|                                 | NP              | IgG4                                  |
| SARS-CoV-1                      | S1              | IgA1                                  |
|                                 | Trimeric S      | IgA2                                  |
|                                 | NP              | IgM                                   |
| HCoV 229E                       | S1              | FcγR2aH                               |
|                                 | S1+2            | FcγR2aR                               |
|                                 | NP              | FcγR2b                                |
| HCoV NL63                       | S1              | FcγR3aV                               |
|                                 | S1+2            | FcγR3aF                               |
|                                 | Trimeric S      | C1q <sup>a</sup>                      |
|                                 | NP              |                                       |
| HCoV OC43                       | S1              |                                       |
|                                 | S2              |                                       |
|                                 | S1+2            |                                       |
|                                 | NP              |                                       |
| HCoV HKU1                       | S1              |                                       |
|                                 | S1+2            |                                       |
|                                 | Trimeric S      |                                       |
|                                 | NP              |                                       |
| C. Tetani                       | Tetanus Toxin   |                                       |
| Influenza A/Cali/07/2009 (H1N1) | Hemagglutinin   |                                       |

<sup>a</sup>C1q binding was not tested for NP of SARS-CoV-2, SARS-CoV-1, HCoV 229E, HCoV NL63, HCoV OC43 and HCoV HKU1, and HCoV 229E S1+2. Abbreviations: FcγR, fragment crystallizable region gamma receptor; C1q, complement component 1q; RBD, receptor binding domain; S, spike; NP, nucleoprotein; HCoV, human coronavirus.

**Supplementary Table 6 Detectable sIL-6Ra, ADAMTS4 and antibody levels in 6 respiratory samples with undetectable cytokine/chemokine levels**

| Sample      | sIL6Ra | ADAMTS4  | IgM   | IgG   | IgA   | % inhibition sVNT |
|-------------|--------|----------|-------|-------|-------|-------------------|
| 002 Sputum  | 2.381  | 15.625   | 2.645 | 1.239 | 4.101 | 3.448             |
| 003 ETA     | 2.970  | 1264.532 | 3.445 | 3.686 | 3.618 | 28.966            |
| 004 ETA d7  | 2.360  | 15.625   | 0.000 | 1.646 | 1.772 | 3.448             |
| 004 ETA d14 | 33.553 | 15.625   | 3.796 | 4.321 | 4.081 | 48.828            |
| 011 Sputum  | 4.404  | 15.625   | 2.456 | 2.818 | 2.366 | 0.690             |
| 013 ETA     | 6.613  | 15.625   | 1.296 | 2.209 | 2.622 | 0.000             |

Please refer to the "Source data" file for the complete database.



**Supplementary Table 7 Flow cytometry antibody panels**

| <b>Colour</b> | <b>Fluorochrome</b> | <b>Respiratory myeloid panel</b> | <b>Respiratory lymphocyte panel</b> | <b>Whole blood lymphocyte panel</b> | <b>Whole blood innate T cell panel</b> |
|---------------|---------------------|----------------------------------|-------------------------------------|-------------------------------------|----------------------------------------|
| Violet        | BV421               | CD66b                            | CXCR5                               | CD71                                |                                        |
|               | BV510               | CD64                             |                                     | CD19                                | Live/Dead                              |
|               | BV605               | HLA-DR                           | HLA-DR                              | HLA-DR                              | CD161                                  |
|               | BV650               | CD4                              | CD4                                 | CD4                                 |                                        |
|               | BV711               | CD32                             | CD27                                | CD27                                | TRAV1-2                                |
|               | BV786               | CD11b                            | CD38                                | CD38                                |                                        |
| Red           | APC                 | CD62L                            | CD56                                | CD56                                |                                        |
|               | AF700               | CD16                             | CD16                                | CD16                                | CD27                                   |
|               | APC-H7              | Live/Dead                        | Live/Dead                           | CD14                                | CD19                                   |
| Blue          | FITC                |                                  | CD45RA                              | CD45RA                              | TCRgd                                  |
|               | PerCP-Cy5.5         | CD45                             | CD45                                | CD8                                 |                                        |
| Yellow-Green  | PE                  | CD38                             | TCRgd                               | TCRgd                               | MR1-5-OP-RU tetramer                   |
|               | ECD                 | CD19                             | CD19                                | CD3                                 |                                        |
|               | PE-Cy7              | CD1c                             | PD-1                                |                                     |                                        |
| UV            | BUV395              | CD3                              | CD3                                 |                                     | CD3                                    |
|               | BUV496              |                                  |                                     |                                     | CD4                                    |
|               | BUV737              | CD14                             | CD14                                |                                     |                                        |
|               | BUV805              | CD8                              | CD8                                 |                                     | CD8                                    |
